# Supplementary material for: Dietary epicatechin improves survival and delays skeletal muscle degeneration in aged mice
Source: PubMed Central journal article supplement (PMC6355074; doi:10.1096/fj.201800554rr), 2018-08-10
Supplement: fj.201800554RR.st3.pdf [file fj.201800554RR.st3.pdf]

**Supplemental table 3: Top 100 pathways that were associated with epicatechin effects based on 222 genes with significantly differential expression between OC and EC (i.e., OC vs. EC)**

| Gene Set (Pathway) Name                                                           | # Genes in Gene Set (K) | Description                                                                                                   | # Genes in Overlap (k) | k/K   | p-value  | FDR q-value |
|-----------------------------------------------------------------------------------|-------------------------|---------------------------------------------------------------------------------------------------------------|------------------------|-------|----------|-------------|
| NABA_CORE_MATRISOME                                                               | 275                     | Ensemble of genes encoding core extracellular matrix including ECM glycoproteins, collagens and proteoglycans | 20                     | 0.073 | 1.58E-18 | 2.10E-15    |
| NABA_MATRISOME                                                                    | 1028                    | Ensemble of genes encoding extracellular matrix and extracellular matrix-associated proteins                  | 29                     | 0.028 | 3.03E-15 | 2.01E-12    |
| REACTOME_DEVELOPMENTAL_BIOLOGY                                                    | 396                     | Genes involved in Developmental Biology                                                                       | 19                     | 0.048 | 2.38E-14 | 1.05E-11    |
| REACTOME_METABOLISM_OF_LIPIDS_AND_LIPOPROTEINS                                    | 478                     | Genes involved in Metabolism of lipids and lipoproteins                                                       | 20                     | 0.042 | 6.23E-14 | 2.07E-11    |
| NABA_COLLAGENS                                                                    | 44                      | Genes encoding collagen proteins                                                                              | 9                      | 0.205 | 3.47E-13 | 8.96E-11    |
| PID_INTEGRIN1_PATHWAY                                                             | 66                      | Beta1 integrin cell surface interactions                                                                      | 10                     | 0.152 | 4.04E-13 | 8.96E-11    |
| KEGG_PPAR_SIGNALING_PATHWAY                                                       | 69                      | PPAR signaling pathway                                                                                        | 10                     | 0.145 | 6.44E-13 | 1.22E-10    |
| REACTOME_NEURONAL_SYSTEM                                                          | 279                     | Genes involved in Neuronal System                                                                             | 15                     | 0.054 | 2.75E-12 | 4.44E-10    |
| REACTOME_TRANSMISSION_ACROSS_CHEMICAL_SYNAPSES                                    | 186                     | Genes involved in Transmission across Chemical Synapses                                                       | 13                     | 0.07  | 3.01E-12 | 4.44E-10    |
| KEGG_ECM_RECEPTOR_INTERACTION                                                     | 84                      | ECM-receptor interaction                                                                                      | 10                     | 0.119 | 4.94E-12 | 5.97E-10    |
| REACTOME_COLLAGEN_FORMATION                                                       | 58                      | Genes involved in Collagen formation                                                                          | 9                      | 0.155 | 4.94E-12 | 5.97E-10    |
| REACTOME_TRANSMEMBRANE_TRANSPORT_OF_SMALL_MOLECULES                               | 413                     | Genes involved in Transmembrane transport of small molecules                                                  | 17                     | 0.041 | 6.59E-12 | 7.30E-10    |
| REACTOME_SIGNALING_BY_PDGF                                                        | 122                     | Genes involved in Signaling by PDGF                                                                           | 11                     | 0.09  | 9.18E-12 | 9.38E-10    |
| REACTOME_FATTY_ACID_TRIACYLGLYCEROL_KETONE_BODY_METABOLISM                        | 168                     | Genes involved in Fatty acid, triacylglycerol, and ketone body metabolism                                     | 12                     | 0.071 | 1.63E-11 | 1.55E-09    |
| REACTOME_GLUCOSE_METABOLISM                                                       | 69                      | Genes involved in Glucose metabolism                                                                          | 9                      | 0.13  | 2.52E-11 | 2.24E-09    |
| KEGG_FOCAL_ADHESION                                                               | 201                     | Focal adhesion                                                                                                | 12                     | 0.06  | 1.32E-10 | 1.10E-08    |
| REACTOME_INTEGRATION_OF_ENERGY_METABOLISM                                         | 120                     | Genes involved in Integration of energy metabolism                                                            | 10                     | 0.083 | 1.81E-10 | 1.41E-08    |
| REACTOME_EXTRACELLULAR_MATRIX_ORGANIZATION                                        | 87                      | Genes involved in Extracellular matrix organization                                                           | 9                      | 0.103 | 2.13E-10 | 1.57E-08    |
| REACTOME_TRIGLYCERIDE_BIOSYNTHESIS                                                | 38                      | Genes involved in Triglyceride Biosynthesis                                                                   | 7                      | 0.184 | 3.44E-10 | 2.41E-08    |
| PID_ENDOTHELIN_PATHWAY                                                            | 63                      | Endothelins                                                                                                   | 8                      | 0.127 | 4.13E-10 | 2.64E-08    |
| REACTOME_NCAM1_INTERACTIONS                                                       | 39                      | Genes involved in NCAM1 interactions                                                                          | 7                      | 0.18  | 4.18E-10 | 2.64E-08    |
| REACTOME_NCAM_SIGNALING_FOR_NEURITE_OUTGROWTH                                     | 64                      | Genes involved in NCAM signaling for neurite outgrowth                                                        | 8                      | 0.125 | 4.70E-10 | 2.84E-08    |
| KEGG_INSULIN_SIGNALING_PATHWAY                                                    | 137                     | Insulin signaling pathway                                                                                     | 10                     | 0.073 | 6.69E-10 | 3.87E-08    |
| REACTOME_METABOLISM_OF_CARBOHYDRATES                                              | 247                     | Genes involved in Metabolism of carbohydrates                                                                 | 12                     | 0.049 | 1.40E-09 | 7.53E-08    |
| PID_SYNDECAN_1_PATHWAY                                                            | 46                      | Syndecan-1-mediated signaling events                                                                          | 7                      | 0.152 | 1.42E-09 | 7.53E-08    |
| PID_AVB3_INTEGRIN_PATHWAY                                                         | 75                      | Integrins in angiogenesis                                                                                     | 8                      | 0.107 | 1.72E-09 | 8.78E-08    |
| REACTOME_GLUONEOGENESIS                                                           | 34                      | Genes involved in Gluconeogenesis                                                                             | 6                      | 0.177 | 8.62E-09 | 4.24E-07    |
| REACTOME_NEUROTRANSMITTER_RECEPTOR_BINDING_AND_DOWNSTREAM_TRANSMISSION_IN_THE_CNS | 137                     | Genes involved in Neurotransmitter Receptor Binding And Downstream Transmission In The CNS                    | 9                      | 0.066 | 1.23E-08 | 5.84E-07    |
| REACTOME_FATTY_ACYL_COA_BIOSYNTHESIS                                              | 18                      | Genes involved in Fatty Acyl-CoA Biosynthesis                                                                 | 5                      | 0.278 | 1.34E-08 | 6.15E-07    |
| REACTOME_GABA_B_RECEPTOR_ACTIVATION                                               | 38                      | Genes involved in GABA B receptor activation                                                                  | 6                      | 0.158 | 1.74E-08 | 7.72E-07    |
| REACTOME_AXON_GUIDANCE                                                            | 251                     | Genes involved in Axon guidance                                                                               | 11                     | 0.044 | 1.99E-08 | 8.53E-07    |
| NABA_BASEMENT_MEMBRANES                                                           | 40                      | Genes encoding structural components of basement membranes                                                    | 6                      | 0.15  | 2.41E-08 | 9.99E-07    |

|                                                                              |     |                                                                                       |    |       |          |          |
|------------------------------------------------------------------------------|-----|---------------------------------------------------------------------------------------|----|-------|----------|----------|
| REACTOME_TRANSCRIPTIONAL_REGULATION_OF_WHITE_ADIPOCY                         | 72  | Genes involved in Transcriptional Regulation of White Adipocyte Differentiation       | 7  | 0.097 | 3.53E-08 | 1.42E-06 |
| PID_INTEGRIN3_PATHWAY                                                        | 43  | Beta3 integrin cell surface interactions                                              | 6  | 0.14  | 3.78E-08 | 1.48E-06 |
| REACTOME_GABA_RECEPTOR_ACTIVATION                                            | 52  | Genes involved in GABA receptor activation                                            | 6  | 0.115 | 1.22E-07 | 4.63E-06 |
| REACTOME_SLC_MEDIATED_TRANSMEMBRANE_TRANSPORT                                | 241 | Genes involved in SLC-mediated transmembrane transport                                | 10 | 0.042 | 1.48E-07 | 5.45E-06 |
| REACTOME_HEMOSTASIS                                                          | 466 | Genes involved in Hemostasis                                                          | 13 | 0.028 | 2.03E-07 | 7.28E-06 |
| REACTOME_TRANSPORT_OF_INORGANIC_CATIONS_ANIONS_AND_AMINO_ACIDS_OLIGOPEPTIDES | 94  | Genes involved in Transport of inorganic cations/anions and amino acids/oligopeptides | 7  | 0.075 | 2.26E-07 | 7.91E-06 |
| REACTOME_ADENYLATE_CYCLASE_INHIBITORY_PATHWAY                                | 13  | Genes involved in Adenylate cyclase inhibitory pathway                                | 4  | 0.308 | 2.61E-07 | 8.68E-06 |
| REACTOME_HORMONE_SENSITIVE_LIPASE_HSL_MEDIATED_TRIACYLGLYCEROL_HYDROLYSIS    | 13  | Genes involved in Hormone-sensitive lipase (HSL)-mediated triacylglycerol hydrolysis  | 4  | 0.308 | 2.61E-07 | 8.68E-06 |
| NABA_ECM_GLYCOPROTEINS                                                       | 196 | Genes encoding structural ECM glycoproteins                                           | 9  | 0.046 | 2.68E-07 | 8.68E-06 |
| REACTOME_PKA_MEDIATED_PHOSPHORYLATION                                        | 18  | Genes involved in PKA-mediated phosphorylation                                        | 4  | 0.222 | 1.10E-06 | 3.48E-05 |
| REACTOME_G_ALPHA_S_SIGNALING_EVENTS                                          | 121 | Genes involved in G alpha (s) signalling events                                       | 7  | 0.058 | 1.26E-06 | 3.90E-05 |
| REACTOME_PLC_BETA_MEDIATED_EVENTS                                            | 43  | Genes involved in PLC beta mediated events                                            | 5  | 0.116 | 1.38E-06 | 4.16E-05 |
| REACTOME_INTEGRIN_CELL_SURFACE_INTERACTIONS                                  | 79  | Genes involved in Integrin cell surface interactions                                  | 6  | 0.076 | 1.51E-06 | 4.46E-05 |
| REACTOME_G_ALPHA_Z_SIGNALING_EVENTS                                          | 44  | Genes involved in G alpha (z) signalling events                                       | 5  | 0.114 | 1.55E-06 | 4.47E-05 |
| REACTOME_LIPID_DIGESTION_MOBILIZATION_AND_TRANSPORT                          | 46  | Genes involved in Lipid digestion, mobilization, and transport                        | 5  | 0.109 | 1.94E-06 | 5.49E-05 |
| REACTOME_AMINO_ACID_AND_OLIGOPEPTIDE_SLC_TRANSPORTERS                        | 49  | Genes involved in Amino acid and oligopeptide SLC transporters                        | 5  | 0.102 | 2.67E-06 | 7.39E-05 |
| REACTOME_AQUAPORIN_MEDIATED_TRANSPORT                                        | 51  | Genes involved in Aquaporin-mediated transport                                        | 5  | 0.098 | 3.27E-06 | 8.86E-05 |
| BIOCARTA_NOS1_PATHWAY                                                        | 24  | Nitric Oxide Signaling Pathway                                                        | 4  | 0.167 | 3.74E-06 | 9.93E-05 |
| REACTOME_PHOSPHOLIPASE_C_MEDIATED_CASCADE                                    | 54  | Genes involved in Phospholipase C-mediated cascade                                    | 5  | 0.093 | 4.35E-06 | 1.13E-04 |
| KEGG_PENTOSE_PHOSPHATE_PATHWAY                                               | 27  | Pentose phosphate pathway                                                             | 4  | 0.148 | 6.11E-06 | 1.56E-04 |
| REACTOME_GLYCOLYSIS                                                          | 29  | Genes involved in Glycolysis                                                          | 4  | 0.138 | 8.21E-06 | 2.06E-04 |
| KEGG_GLYCOLYSIS_GLUONEOGENESIS                                               | 62  | Glycolysis / Gluconeogenesis                                                          | 5  | 0.081 | 8.65E-06 | 2.13E-04 |
| REACTOME_CA_DEPENDENT_EVENTS                                                 | 30  | Genes involved in Ca-dependent events                                                 | 4  | 0.133 | 9.44E-06 | 2.28E-04 |
| BIOCARTA_GLYCOLYSIS_PATHWAY                                                  | 10  | Glycolysis Pathway                                                                    | 3  | 0.3   | 1.01E-05 | 2.36E-04 |
| REACTOME_ADENYLATE_CYCLASE_ACTIVATING_PATHWAY                                | 10  | Genes involved in Adenylate cyclase activating pathway                                | 3  | 0.3   | 1.01E-05 | 2.36E-04 |
| PID_LYSOPHOSPHOLIPID_PATHWAY                                                 | 66  | LPA receptor mediated events                                                          | 5  | 0.076 | 1.18E-05 | 2.70E-04 |
| REACTOME_DAG_AND_IP3_SIGNALING                                               | 32  | Genes involved in DAG and IP3 signaling                                               | 4  | 0.125 | 1.23E-05 | 2.77E-04 |
| REACTOME_GLUCAGON_SIGNALING_IN_METABOLIC_REGULATION                          | 34  | Genes involved in Glucagon signaling in metabolic regulation                          | 4  | 0.118 | 1.58E-05 | 3.49E-04 |
| KEGG_CALCIIUM_SIGNALING_PATHWAY                                              | 178 | Calcium signaling pathway                                                             | 7  | 0.039 | 1.61E-05 | 3.51E-04 |
| BIOCARTA_GPCR_PATHWAY                                                        | 37  | Signaling Pathway from G-Protein Families                                             | 4  | 0.108 | 2.22E-05 | 4.68E-04 |
| BIOCARTA_PAR1_PATHWAY                                                        | 37  | Thrombin signaling and protease-activated                                             | 4  | 0.108 | 2.22E-05 | 4.68E-04 |
| REACTOME_OPIOID_SIGNALING                                                    | 78  | Genes involved in Opioid Signalling                                                   | 5  | 0.064 | 2.66E-05 | 5.53E-04 |
| PID_LPA4_PATHWAY                                                             | 15  | LPA4-mediated signaling events                                                        | 3  | 0.2   | 3.77E-05 | 7.71E-04 |
| KEGG_PROGESTERONE_MEDIATED_OOCYTE_MATURATION                                 | 86  | Progesterone-mediated oocyte maturation                                               | 5  | 0.058 | 4.27E-05 | 8.59E-04 |
| REACTOME_PLATELET_ACTIVATION_SIGNALING_AND_AGGREGATION                       | 208 | Genes involved in Platelet activation, signaling and aggregation                      | 7  | 0.034 | 4.36E-05 | 8.64E-04 |
| REACTOME_REGULATION_OF_WATER_BALANCE_BY_RENAL_AQUAPORINS                     | 44  | Genes involved in Regulation of Water Balance by Renal Aquaporins                     | 4  | 0.091 | 4.45E-05 | 8.70E-04 |
| PID_HNF3B_PATHWAY                                                            | 45  | FOXA2 and FOXA3 transcription factor networks                                         | 4  | 0.089 | 4.87E-05 | 9.38E-04 |
| KEGG_GAP_JUNCTION                                                            | 90  | Gap junction                                                                          | 5  | 0.056 | 5.31E-05 | 1.01E-03 |

|                                                                      |     |                                                                               |    |       |          |          |
|----------------------------------------------------------------------|-----|-------------------------------------------------------------------------------|----|-------|----------|----------|
| REACTOME_REGULATION_OF_INSULIN_SECRETION                             | 93  | Genes involved in Regulation of Insulin Secretion                             | 5  | 0.054 | 6.21E-05 | 1.16E-03 |
| KEGG_GLYCEROLIPID_METABOLISM                                         | 49  | Glycerolipid metabolism                                                       | 4  | 0.082 | 6.83E-05 | 1.26E-03 |
| REACTOME_DOWNSTREAM_SIGNALING_ACTIVATED_FGFR                         | 100 | Genes involved in Downstream signaling of activated FGFR                      | 5  | 0.05  | 8.78E-05 | 1.60E-03 |
| KEGG_GNRH_SIGNALING_PATHWAY                                          | 101 | GnRH signaling pathway                                                        | 5  | 0.05  | 9.20E-05 | 1.65E-03 |
| KEGG_MELANOGENESIS                                                   | 102 | Melanogenesis                                                                 | 5  | 0.049 | 9.64E-05 | 1.71E-03 |
| REACTOME_PPARA_ACTIVATES_GENE_EXPRESSION                             | 104 | Genes involved in PPARA Activates Gene Expression                             | 5  | 0.048 | 1.06E-04 | 1.85E-03 |
| KEGG_PATHWAYS_IN_CANCER                                              | 328 | Pathways in cancer                                                            | 8  | 0.024 | 1.19E-04 | 2.06E-03 |
| KEGG_BIOSYNTHESIS_OF_UNSATURATED_FATTY_ACIDS                         | 22  | Biosynthesis of unsaturated fatty acids                                       | 3  | 0.136 | 1.25E-04 | 2.13E-03 |
| KEGG_PROXIMAL_TUBULE_BICARBONATE_RECLAMATION                         | 23  | Proximal tubule bicarbonate reclamation                                       | 3  | 0.13  | 1.43E-04 | 2.40E-03 |
| REACTOME_SIGNALING_FGFR                                              | 112 | Genes involved in Signaling by FGFR                                           | 5  | 0.045 | 1.50E-04 | 2.49E-03 |
| BIOCARTA_CXCR4_PATHWAY                                               | 24  | CXCR4 Signaling Pathway                                                       | 3  | 0.125 | 1.63E-04 | 2.64E-03 |
| REACTOME_SULFUR_AMINO_ACID_METABOLISM                                | 24  | Genes involved in Sulfur amino acid metabolism                                | 3  | 0.125 | 1.63E-04 | 2.64E-03 |
| KEGG_VASCULAR_SMOOTH_MUSCLE_CONTRACTION                              | 115 | Vascular smooth muscle contraction                                            | 5  | 0.044 | 1.70E-04 | 2.71E-03 |
| REACTOME_INHIBITION_OF_INSULIN_SECRETION_BY_ADRENALINE_NORADRENALINE | 25  | Genes involved in Inhibition of Insulin Secretion by Adrenaline/Noradrenaline | 3  | 0.12  | 1.84E-04 | 2.92E-03 |
| KEGG_CHEMOKINE_SIGNALING_PATHWAY                                     | 190 | Chemokine signaling pathway                                                   | 6  | 0.032 | 2.18E-04 | 3.39E-03 |
| PID_HIF1_TFPATHWAY                                                   | 66  | HIF-1-alpha transcription factor network                                      | 4  | 0.061 | 2.19E-04 | 3.39E-03 |
| KEGG_NEUROACTIVE_LIGAND_RECEPTOR_INTERACTION                         | 272 | Neuroactive ligand-receptor interaction                                       | 7  | 0.026 | 2.30E-04 | 3.48E-03 |
| BIOCARTA_CREB_PATHWAY                                                | 27  | Transcription factor CREB and its extracellular                               | 3  | 0.111 | 2.33E-04 | 3.48E-03 |
| BIOCARTA_EDG1_PATHWAY                                                | 27  | Phospholipids as signalling intermediaries                                    | 3  | 0.111 | 2.33E-04 | 3.48E-03 |
| REACTOME_SIGNALING_GPCR                                              | 920 | Genes involved in Signaling by GPCR                                           | 13 | 0.014 | 2.65E-04 | 3.91E-03 |
| REACTOME_SIGNALING_BY_FGFR_IN_DISEASE                                | 127 | Genes involved in Signaling by FGFR in disease                                | 5  | 0.039 | 2.69E-04 | 3.93E-03 |
| KEGG_LONG_TERM_POTENTIATION                                          | 70  | Long-term potentiation                                                        | 4  | 0.057 | 2.75E-04 | 3.97E-03 |
| REACTOME_GPCR_DOWNSTREAM_SIGNALING                                   | 805 | Genes involved in GPCR downstream signaling                                   | 12 | 0.015 | 2.82E-04 | 4.03E-03 |
| KEGG_GLYCINE_SERINE_AND_THREONINE_METABOLISM                         | 31  | Glycine, serine and threonine metabolism                                      | 3  | 0.097 | 3.53E-04 | 5.00E-03 |
| REACTOME_NGF_SIGNALLING_VIA_TRKA_FROM_THE_PLASMA_MEMBRANE            | 137 | Genes involved in NGF signalling via TRKA from the plasma membrane            | 5  | 0.037 | 3.81E-04 | 5.34E-03 |
| KEGG_PROPANOATE_METABOLISM                                           | 33  | Propanoate metabolism                                                         | 3  | 0.091 | 4.26E-04 | 5.84E-03 |
| REACTOME_POST_NMDA_RECEPTOR_ACTIVATION_EVENTS                        | 33  | Genes involved in Post NMDA receptor activation events                        | 3  | 0.091 | 4.26E-04 | 5.84E-03 |
| REACTOME_SIGNALLING_NGF                                              | 217 | Genes involved in Signalling by NGF                                           | 6  | 0.028 | 4.43E-04 | 6.00E-03 |
| BIOCARTA_MPR_PATHWAY                                                 | 34  | How Progesterone Initiates Oocyte Membrane                                    | 3  | 0.088 | 4.66E-04 | 6.13E-03 |
| KEGG_BUTANOATE_METABOLISM                                            | 34  | Butanoate metabolism                                                          | 3  | 0.088 | 4.66E-04 | 6.13E-03 |

---

Collection(s): Canonical Pathways  
 # overlaps shown: 100  
 # genesets in collections: 1329  
 # genes in comparison (n): 204  
 # genes in universe (N): 45956
