# Supplementary material for: Dietary epicatechin improves survival and delays skeletal muscle degeneration in aged mice
Source: PubMed Central journal article supplement (PMC6355074; doi:10.1096/fj.201800554rr), 2018-08-10
Supplement: fj.201800554RR.st4.pdf [file fj.201800554RR.st4.pdf]

**Supplemental table 4: Top 55 pathways that were associated with epicatechin effects based on 92 genes with significantly differential expression in both YC vs. OC and OC vs. EC.**

| Gene Set (Pathway) Name                                                | # Genes in Gene Set (K) | Description                                                                                                   | # Genes in Overlap |        | p-value  | FDR q-value |
|------------------------------------------------------------------------|-------------------------|---------------------------------------------------------------------------------------------------------------|--------------------|--------|----------|-------------|
|                                                                        |                         |                                                                                                               | (k)                | k/K    |          |             |
| NABA_CORE_MATRISOME                                                    | 275                     | Ensemble of genes encoding core extracellular matrix including ECM glycoproteins, collagens and proteoglycans | 18                 | 0.0655 | 1.14E-22 | 1.52E-19    |
| NABA_MATRISOME                                                         | 1028                    | Ensemble of genes encoding extracellular matrix and extracellular matrix-associated                           | 23                 | 0.0224 | 2.51E-18 | 1.67E-15    |
| PID_INTEGRIN1_PATHWAY                                                  | 66                      | Beta1 integrin cell surface interactions                                                                      | 10                 | 0.1515 | 8.50E-17 | 3.76E-14    |
| KEGG_ECM_RECEPTOR_INTERACTION                                          | 84                      | ECM-receptor interaction                                                                                      | 10                 | 0.119  | 1.08E-15 | 3.59E-13    |
| REACTOME_DEVELOPMENTAL_BIOLOGY                                         | 396                     | Genes involved in Developmental Biology                                                                       | 15                 | 0.0379 | 1.76E-15 | 4.68E-13    |
| NABA_COLLAGENS                                                         | 44                      | Genes encoding collagen proteins                                                                              | 8                  | 0.1818 | 2.40E-14 | 5.31E-12    |
| KEGG_FOCAL_ADHESION                                                    | 201                     | Focal adhesion                                                                                                | 11                 | 0.0547 | 2.31E-13 | 4.22E-11    |
| REACTOME_COLLAGEN_FORMATION                                            | 58                      | Genes involved in Collagen formation                                                                          | 8                  | 0.1379 | 2.54E-13 | 4.22E-11    |
| KEGG_PPAR_SIGNALING_PATHWAY                                            | 69                      | PPAR signaling pathway                                                                                        | 8                  | 0.1159 | 1.09E-12 | 1.56E-10    |
| REACTOME_NCAM1_INTERACTIONS                                            | 39                      | Genes involved in NCAM1 interactions                                                                          | 7                  | 0.1795 | 1.17E-12 | 1.56E-10    |
| REACTOME_EXTRACELLULAR_MATRIX_ORGANIZATION                             | 87                      | Genes involved in Extracellular matrix organization                                                           | 8                  | 0.092  | 7.39E-12 | 8.93E-10    |
| REACTOME_NCAM_SIGNALING_FOR_NEURITE_OUTGROWTH                          | 64                      | Genes involved in NCAM signaling for neurite out-growth                                                       | 7                  | 0.1094 | 4.56E-11 | 5.05E-09    |
| REACTOME_SIGNALING_BY_PDGF                                             | 122                     | Genes involved in Signaling by PDGF                                                                           | 8                  | 0.0656 | 1.15E-10 | 1.18E-08    |
| PID_INTEGRIN3_PATHWAY                                                  | 43                      | Beta3 integrin cell surface interactions                                                                      | 6                  | 0.1395 | 2.56E-10 | 2.43E-08    |
| PID_SYNDECAN_1_PATHWAY                                                 | 46                      | Syndecan-1-mediated signaling events                                                                          | 6                  | 0.1304 | 3.91E-10 | 3.47E-08    |
| REACTOME_AXON_GUIDANCE                                                 | 251                     | Genes involved in Axon guidance                                                                               | 9                  | 0.0359 | 1.63E-09 | 1.35E-07    |
| NABA_ECM_GLYCOPROTEINS                                                 | 196                     | Genes encoding structural ECM glycoproteins                                                                   | 8                  | 0.0408 | 4.98E-09 | 3.90E-07    |
| PID_AVB3_INTEGRIN_PATHWAY                                              | 75                      | Integrins in angiogenesis                                                                                     | 6                  | 0.08   | 8.04E-09 | 5.94E-07    |
| REACTOME_INTEGRIN_CELL_SURFACE_INTERACTIONS                            | 79                      | Genes involved in Integrin cell surface interactions                                                          | 6                  | 0.0759 | 1.10E-08 | 7.71E-07    |
| NABA_BASEMENT_MEMBRANE                                                 | 40                      | Genes encoding structural components of basement membrane                                                     | 5                  | 0.125  | 1.52E-08 | 1.01E-06    |
| REACTOME_METABOLISM_OF_LIPIDS_AND_LIPOPROTEINS                         | 478                     | Genes involved in Metabolism of lipids and lipoproteins                                                       | 10                 | 0.0209 | 3.30E-08 | 2.09E-06    |
| REACTOME_TRANSCRIPTIONAL_REGULATION_OF_WHITE_ADIPOCYTE_DIFFERENTIATION | 72                      | Genes involved in Transcriptional Regulation of White Adipocyte Differentiation                               | 5                  | 0.0694 | 3.07E-07 | 1.85E-05    |
| REACTOME_FATTY_ACID_METABOLISM                                         | 168                     | Genes involved in Fatty acid, triacylglycerol, and ketone body metabolism                                     | 6                  | 0.0357 | 9.87E-07 | 5.70E-05    |
| REACTOME_TRANSMEMBRANE_TRANSPORT                                       | 413                     | Genes involved in Transmembrane transport of small molecules                                                  | 8                  | 0.0194 | 1.49E-06 | 8.24E-05    |
| PID_HNF3B_PATHWAY                                                      | 45                      | FOXA2 and FOXA3 transcription factor                                                                          | 4                  | 0.0889 | 1.84E-06 | 9.79E-05    |
| REACTOME_PPARA_ACTIVATES_GENE_EXPRESSION                               | 104                     | Genes involved in PPARA Activates Gene Expression                                                             | 5                  | 0.0481 | 1.92E-06 | 9.83E-05    |
| KEGG_INSULIN_SIGNALING_PATHWAY                                         | 137                     | Insulin signaling pathway                                                                                     | 5                  | 0.0365 | 7.43E-06 | 3.66E-04    |

|                       |     |                                            |   |        |          |          |
|-----------------------|-----|--------------------------------------------|---|--------|----------|----------|
| REACTOME_GLUCOSE_M    | 69  | Genes involved in Glucose metabolism       | 4 | 0.058  | 1.03E-05 | 4.90E-04 |
| KEGG_SMALL_CELL_LUN   | 84  | Small cell lung cancer                     | 4 | 0.0476 | 2.25E-05 | 1.03E-03 |
| REACTOME_HEMOSTASI    | 466 | Genes involved in Hemostasis               | 7 | 0.015  | 3.55E-05 | 1.57E-03 |
| REACTOME_GLUONEO      | 34  | Genes involved in Gluconeogenesis          | 3 | 0.0882 | 4.02E-05 | 1.72E-03 |
| KEGG_PATHWAYS_IN_CA   | 328 | Pathways in cancer                         | 6 | 0.0183 | 4.46E-05 | 1.85E-03 |
| REACTOME_LIPID_DIGES  |     | Genes involved in Lipid digestion,         |   |        |          |          |
| TION_MOBILIZATION_AN  | 46  | mobilization, and transport                | 3 | 0.0652 | 1.00E-04 | 4.04E-03 |
| REACTOME_METABOLIS    |     | Genes involved in Metabolism of            |   |        |          |          |
| M_OF_CARBOHYDRATES    | 247 | carbohydrates                              | 5 | 0.0202 | 1.24E-04 | 4.84E-03 |
| BIOCARTA_VITCB_PATH   | 11  | Vitamin C in the Brain                     | 2 | 0.1818 | 2.02E-04 | 7.66E-03 |
| REACTOME_PLATELET_A   |     | Genes involved in Platelet Adhesion to     |   |        |          |          |
| DHESION_TO_EXPOSED_   | 12  | exposed collagen                           | 2 | 0.1667 | 2.42E-04 | 8.73E-03 |
| KEGG_GLYCOLYSIS_GLuc  |     |                                            |   |        |          |          |
| ONEOGENESIS           | 62  | Glycolysis / Gluconeogenesis               | 3 | 0.0484 | 2.44E-04 | 8.73E-03 |
| PID_ENDOTHELIN_PATH   | 63  | Endothelins                                | 3 | 0.0476 | 2.56E-04 | 8.73E-03 |
| PID_MYC_REPRESS_PAT   | 63  | Validated targets of C-MYC transcriptional | 3 | 0.0476 | 2.56E-04 | 8.73E-03 |
| BIOCARTA_ACE2_PATHW   | 13  | Angiotensin-converting enzyme 2 regulates  | 2 | 0.1538 | 2.85E-04 | 9.25E-03 |
| REACTOME_HORMONE_     |     |                                            |   |        |          |          |
| SENSITIVE_LIPASE_HSL_ |     | Genes involved in Hormone-sensitive lipase |   |        |          |          |
| MEDIATED_TRIACYLGLYC  | 13  | (HSL)-mediated triacylglycerol hydrolysis  | 2 | 0.1538 | 2.85E-04 | 9.25E-03 |
| BIOCARTA_PLATELETAPP  | 14  | Platelet Amyloid Precursor Protein Pathway | 2 | 0.1429 | 3.32E-04 | 1.05E-02 |
| BIOCARTA_COMP_PATH    | 19  | Complement Pathway                         | 2 | 0.1053 | 6.21E-04 | 1.92E-02 |
| BIOCARTA_AMI_PATHW    | 20  | Acute Myocardial Infarction                | 2 | 0.1    | 6.89E-04 | 2.03E-02 |
| ST_WNT_CA2_CYCLIC_G   |     |                                            |   |        |          |          |
| MP_PATHWAY            | 20  | Wnt/Ca2+/cyclic GMP signaling.             | 2 | 0.1    | 6.89E-04 | 2.03E-02 |
| REACTOME_PLATELET_A   |     | Genes involved in Platelet activation,     |   |        |          |          |
| CTIVATION_SIGNALING_  | 208 | signaling and aggregation                  | 4 | 0.0192 | 7.37E-04 | 2.13E-02 |
| BIOCARTA_INTRINSIC_PA | 23  | Intrinsic Prothrombin Activation Pathway   | 2 | 0.087  | 9.14E-04 | 2.53E-02 |
| KEGG_PROXIMAL_TUBUL   |     |                                            |   |        |          |          |
| E_BICARBONATE_RECLA   | 23  | Proximal tubule bicarbonate reclamation    | 2 | 0.087  | 9.14E-04 | 2.53E-02 |
| PID_LYMPH_ANGIOGENE   |     |                                            |   |        |          |          |
| SIS_PATHWAY           | 25  | VEGFR3 signaling in lymphatic endothelium  | 2 | 0.08   | 1.08E-03 | 2.93E-02 |
| KEGG_PENTOSE_PHOSP    |     |                                            |   |        |          |          |
| HATE_PATHWAY          | 27  | Pentose phosphate pathway                  | 2 | 0.0741 | 1.26E-03 | 3.31E-02 |
| REACTOME_SLC_MEDIAT   |     | Genes involved in SLC-mediated             |   |        |          |          |
| ED_TRANSMEMBRANE_T    | 241 | transmembrane transport                    | 4 | 0.0166 | 1.27E-03 | 3.31E-02 |
| REACTOME_GLYCOLYSIS   | 29  | Genes involved in Glycolysis               | 2 | 0.069  | 1.46E-03 | 3.72E-02 |
| REACTOME_GPVI_MEDIA   |     | Genes involved in GPVI-mediated activation |   |        |          |          |
| TED_ACTIVATION_CASCA  | 31  | cascade                                    | 2 | 0.0645 | 1.66E-03 | 4.17E-02 |
| REACTOME_G_ALPHA_S    |     | Genes involved in G alpha (s) signalling   |   |        |          |          |
| _SIGNALLING_EVENTS    | 121 | events                                     | 3 | 0.0248 | 1.71E-03 | 4.22E-02 |
| KEGG_FRUCTOSE_AND_    |     |                                            |   |        |          |          |
| MANNOSE_METABOLIS     | 34  | Fructose and mannose metabolism            | 2 | 0.0588 | 2.00E-03 | 4.83E-02 |

Collection(s): Canonical Pathways

# overlaps shown: 55

# genesets in collections: 1329

# genes in comparison (n) 89

# genes in universe (N): 45956
